# Supplementary material for: Submicron 3,4-dihydroxybenzoic acid–TiO2 composite particles for enhanced MALDI MS imaging of secondary metabolites in the root of differently aged baical skullcap
Source: Royal Society of Chemistry journal article supplement (doi:10.1039/d2an00710j), 2022-01-01
Supplement: d2an00710j1.pdf [file d2an00710j1.pdf]

## Supporting Information

### Submicron 3,4-Dihydroxybenzoic acid-TiO<sub>2</sub> Composite Particles for Enhanced MALDI MS Imaging of Secondary Metabolites in the Root of Different-aged Baical Skullcap

Ruiyang Sun<sup>†</sup>, Ying Zhang<sup>†</sup>, Weiwei Tang, Bin Li<sup>\*</sup>

State Key Laboratory of Natural Medicines and School of Traditional Chinese Pharmacy,  
China Pharmaceutical University, Nanjing, 210009, China

---

#### CONTENTS

**Figure S1.** Coordination structures for A) catecholate and B) salicylate binding.

**Figure S2.** MALDI mass spectra acquired from root sections of *S. baicalensis* using A) 2,3-DHB-TiO<sub>2</sub> CPs, B) 2,4-DHB-TiO<sub>2</sub> CPs, C) 2,5-DHB-TiO<sub>2</sub> CPs, D) 2,6-DHB-TiO<sub>2</sub> CPs, and E) 3,5-DHB-TiO<sub>2</sub> CPs, respectively.

**Figure S3.** Comparison of the mean peak intensities of five representative flavonoids measured using six different DHB-TiO<sub>2</sub> CPs.

**Figure S4.** MALDI mass spectra acquired from root sections of *S. baicalensis* using A) DHB and B) CHCA in the positive ion mode, respectively. Background MALDI mass spectra obtained by using C) DHB and D) CHCA in the positive ion mode, respectively.

**Table S1.** Metabolite putatively assigned in *S. baicalensis* root tissue by positive ion MALDI MS using 3,4-DHB-TiO<sub>2</sub> CPs.

**Table S2.** Determination of major metabolites in *S. baicalensis* root tissues by LC-MS/MS.

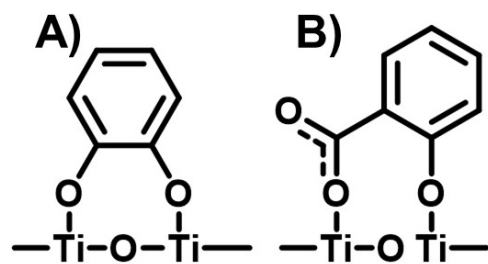

**Figure S1.** Coordination structures for A) catecholate and B) salicylate binding.

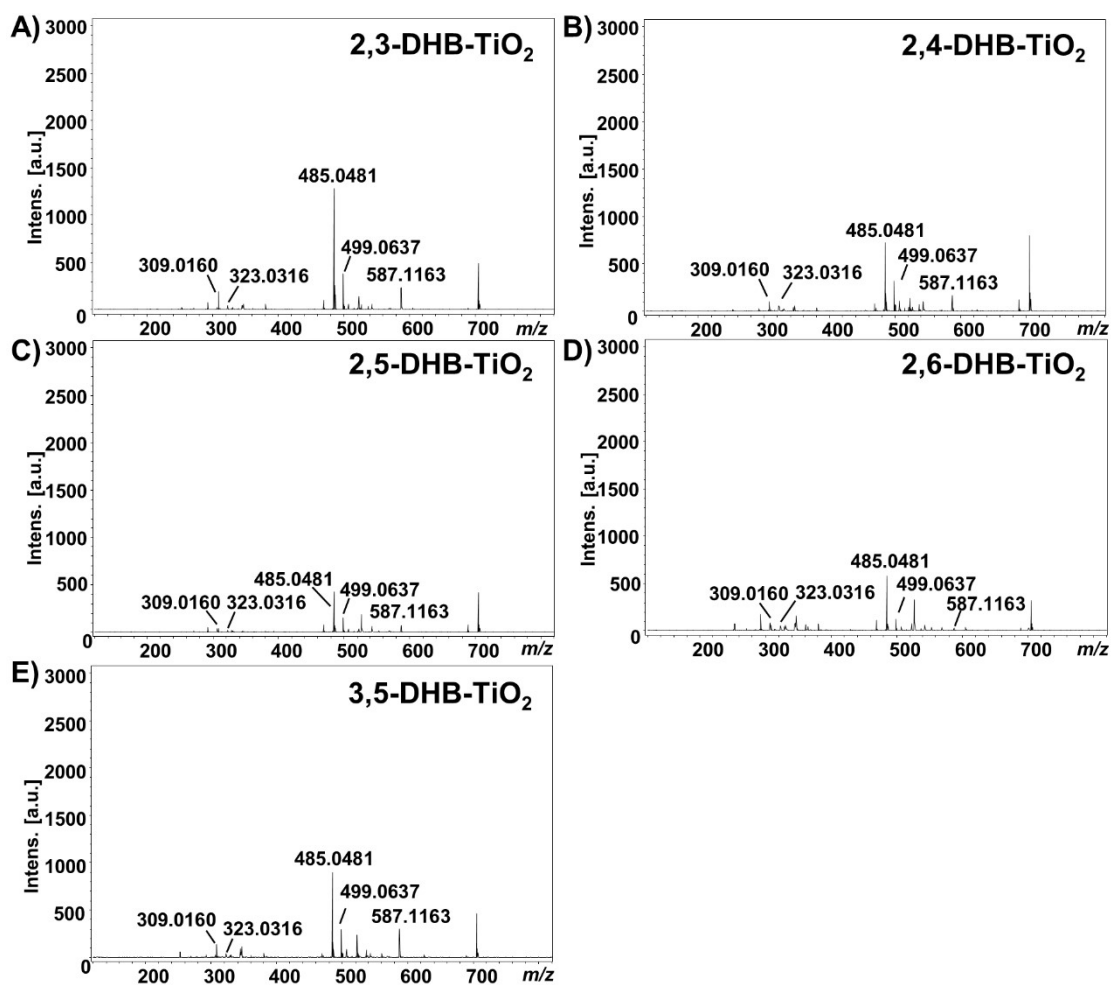

**Figure S2.** MALDI mass spectra acquired from root sections of *S. baicalensis* using A) 2,3-DHB-TiO<sub>2</sub> CPs, B) 2,4-DHB-TiO<sub>2</sub> CPs, C) 2,5-DHB-TiO<sub>2</sub> CPs, D) 2,6-DHB-TiO<sub>2</sub> CPs, and E) 3,5-DHB-TiO<sub>2</sub> CPs, respectively.

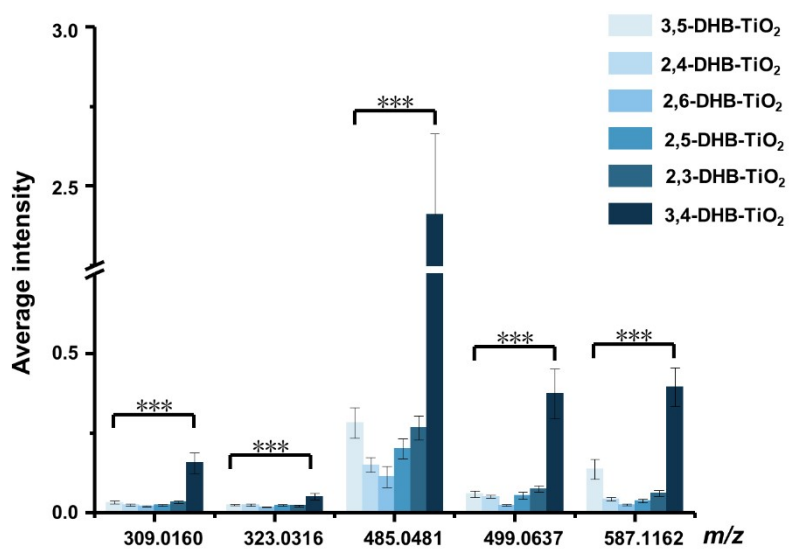

**Figure S3.** Comparison of the mean peak intensities of five representative flavonoids measured using six different DHB-TiO<sub>2</sub> CPs. Data are expressed as mean  $\pm$  SD (n=10), and One-way ANOVA statistical analysis was performed for each group, significantly different from 3,4-DHB-TiO<sub>2</sub> CPs at \* $p < 0.05$ , \*\* $p < 0.01$ , \*\*\* $p < 0.001$ .

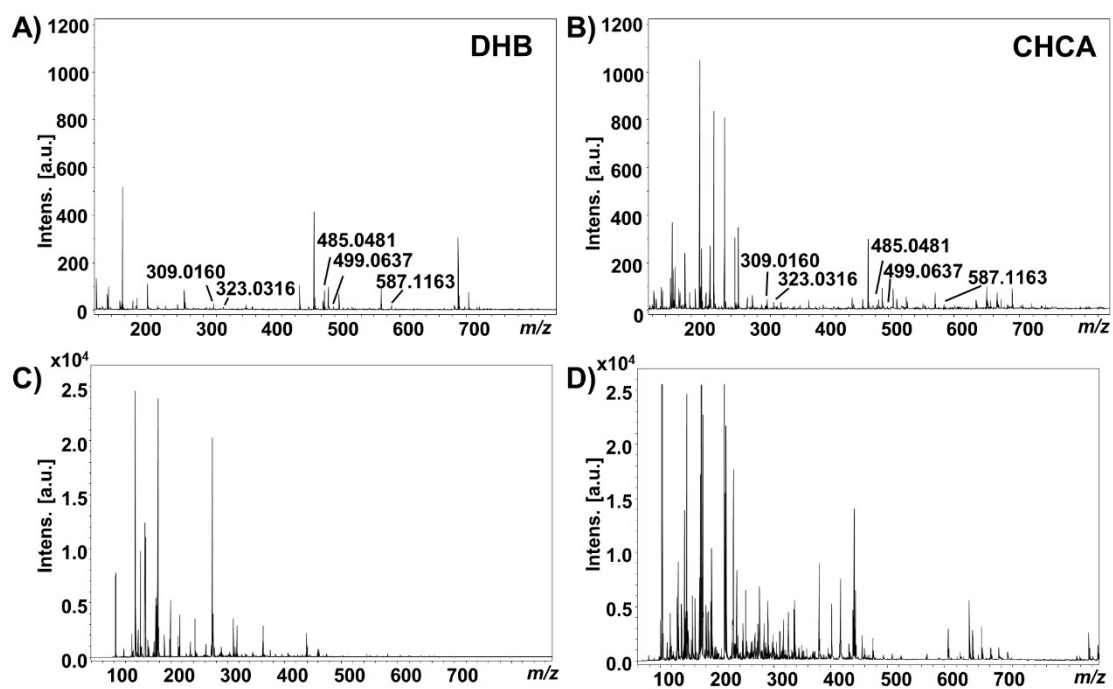

**Figure S4.** MALDI mass spectra acquired from root sections of *S. baicalensis* using A) DHB and B) CHCA in the positive ion mode, respectively. Background MALDI mass spectra obtained by using C) DHB and D) CHCA in the positive ion mode, respectively.

**Table S1.** Metabolite putatively assigned in *S. baicalensis* root tissue by positive ion MALDI MS using 3,4-DHB-TiO<sub>2</sub> CPs.

| Classification              | Compound                                          | Calculated (m/z) | Measured (m/z) | Error (ppm) | Adduct ion            | Molecular Formula                               |
|-----------------------------|---------------------------------------------------|------------------|----------------|-------------|-----------------------|-------------------------------------------------|
| <b>Free flavonoids</b>      |                                                   |                  |                |             |                       |                                                 |
|                             | Baicalein                                         | 309.0160         | 309.0160       | 0.05        | [M + K] <sup>+</sup>  | C <sub>15</sub> H <sub>10</sub> O <sub>5</sub>  |
|                             | Wogonin                                           | 323.0316         | 323.0311       | -1.65       | [M + K] <sup>+</sup>  | C <sub>16</sub> H <sub>12</sub> O <sub>5</sub>  |
|                             | Scutellarein                                      | 325.0109         | 325.0104       | -1.53       | [M + K] <sup>+</sup>  | C <sub>15</sub> H <sub>10</sub> O <sub>6</sub>  |
|                             | Trihydroxy-methoxyflavone                         | 339.0265         | 339.0263       | -0.73       | [M + K] <sup>+</sup>  | C <sub>16</sub> H <sub>12</sub> O <sub>6</sub>  |
|                             | Dihydroxy-dimethoxyflavone                        | 353.0422         | 353.0423       | 0.29        | [M + K] <sup>+</sup>  | C <sub>17</sub> H <sub>14</sub> O <sub>6</sub>  |
|                             | Trihydroxy-dimethoxyflavone                       | 369.0371         | 369.037        | -0.31       | [M + K] <sup>+</sup>  | C <sub>17</sub> H <sub>14</sub> O <sub>7</sub>  |
|                             | Dihydroxy-trimethoxyflavone                       | 383.0528         | 383.0524       | -0.95       | [M + K] <sup>+</sup>  | C <sub>18</sub> H <sub>16</sub> O <sub>7</sub>  |
|                             | Viscidulin III                                    | 385.032          | 385.0321       | 0.19        | [M + K] <sup>+</sup>  | C <sub>17</sub> H <sub>14</sub> O <sub>8</sub>  |
|                             | Skullcap flavone II                               | 413.0633         | 413.0632       | -0.31       | [M + K] <sup>+</sup>  | C <sub>19</sub> H <sub>18</sub> O <sub>8</sub>  |
| <b>Flavonoid glycosides</b> |                                                   |                  |                |             |                       |                                                 |
|                             | Chrysin-5-O-glucoside                             | 455.0739         | 455.0741       | 0.45        | [M + K] <sup>+</sup>  | C <sub>21</sub> H <sub>20</sub> O <sub>9</sub>  |
|                             | Chrysin-7-O-glucoside                             |                  |                |             |                       |                                                 |
|                             | Chrysin-7-O-glucuronide                           | 469.0532         | 469.0531       | -0.12       | [M + K] <sup>+</sup>  | C <sub>21</sub> H <sub>18</sub> O <sub>10</sub> |
|                             | Baicalein-7-O-glucoside                           | 471.0688         | 471.0688       | -0.02       | [M + K] <sup>+</sup>  | C <sub>21</sub> H <sub>20</sub> O <sub>10</sub> |
|                             | Norwogonin-7-O-glucoside                          |                  |                |             |                       |                                                 |
|                             | Dihydrobaicalein-7-O-glucoside                    | 473.0845         | 473.0845       | 0.09        | [M + K] <sup>+</sup>  | C <sub>21</sub> H <sub>22</sub> O <sub>10</sub> |
|                             | Baicalin                                          | 485.0481         | 485.0481       | 0.06        | [M + K] <sup>+</sup>  | C <sub>21</sub> H <sub>18</sub> O <sub>11</sub> |
|                             | Wogonoside                                        | 499.0637         | 499.0636       | -0.2        | [M + K] <sup>+</sup>  | C <sub>22</sub> H <sub>20</sub> O <sub>11</sub> |
|                             | Carthamidin-7-O-glucuronide                       | 503.0586         | 503.0595       | -0.27       | [M + K] <sup>+</sup>  | C <sub>21</sub> H <sub>20</sub> O <sub>12</sub> |
|                             | Isocarthamidin-7-O-glucuronide                    |                  |                |             |                       |                                                 |
|                             | Trihydroxy-methoxyflavone-glucuronide             | 515.0586         | 515.0584       | -0.46       | [M + K] <sup>+</sup>  | C <sub>22</sub> H <sub>20</sub> O <sub>12</sub> |
|                             | Dihydroxy-dimethoxyflavone-glucuronide            | 529.0743         | 529.0743       | 0.02        | [M + K] <sup>+</sup>  | C <sub>23</sub> H <sub>22</sub> O <sub>12</sub> |
|                             | Trihydroxy-dimethoxyflavone-glucoside             | 531.0899         | 531.0898       | -0.26       | [M + K] <sup>+</sup>  | C <sub>23</sub> H <sub>24</sub> O <sub>12</sub> |
|                             | Trihydroxy-dimethoxyflavone-glucuronide           | 545.0692         | 545.0694       | 0.36        | [M + K] <sup>+</sup>  | C <sub>23</sub> H <sub>22</sub> O <sub>13</sub> |
|                             | Chrysin-6-C-glucopyranoside-8-C-arabinopyranoside | 587.1162         | 587.1163       | 0.25        | [M + K] <sup>+</sup>  | C <sub>26</sub> H <sub>28</sub> O <sub>13</sub> |
|                             | Chrysin-6-C-arabinopyranoside-8-C-glucopyranoside |                  |                |             |                       |                                                 |
| <b>Other metabolites</b>    |                                                   |                  |                |             |                       |                                                 |
|                             | Stigmasterol                                      | 451.3337         | 451.3336       | -0.16       | [M + K] <sup>+</sup>  | C <sub>29</sub> H <sub>48</sub> O               |
|                             | Darendoside A                                     | 471.1263         | 471.126        | -0.69       | [M + K] <sup>+</sup>  | C <sub>19</sub> H <sub>28</sub> O <sub>11</sub> |
|                             | Darendoside B                                     | 515.1525         | 515.1523       | -0.39       | [M + K] <sup>+</sup>  | C <sub>21</sub> H <sub>32</sub> O <sub>12</sub> |
|                             | Daucosterol                                       | 615.4021         | 615.4022       | 0.08        | [M + K] <sup>+</sup>  | C <sub>35</sub> H <sub>60</sub> O <sub>6</sub>  |
|                             | Martynoside                                       | 675.2259         | 675.2256       | -0.51       | [M + Na] <sup>+</sup> | C <sub>31</sub> H <sub>40</sub> O <sub>15</sub> |

**Table S2.** Determination of major metabolites in *S. baicalensis* root tissues by LC-MS/MS.

| No. | t <sub>R</sub> /min | Molecular formula                               | Calculated (m/z) | Measured (m/z) | Error (ppm) | Compound                                                                                            | Structurally specific CID ions (m/z)   |
|-----|---------------------|-------------------------------------------------|------------------|----------------|-------------|-----------------------------------------------------------------------------------------------------|----------------------------------------|
| 1   | 4.013               | C <sub>21</sub> H <sub>20</sub> O <sub>12</sub> | 463.0882         | 463.0855       | -5.84       | Carthamidin-7-O-glucuronide/Isocarthamidin-7-O-glucuronide                                          | 287.0531, 166.9903                     |
| 2   | 4.637               | C <sub>26</sub> H <sub>28</sub> O <sub>13</sub> | 547.1457         | 547.1443       | -2.59       | Chrysin-6-C-glucopyranoside-8-C-arabinopyranoside/Chrysin-6-C-arabinopyranoside-8-C-glucopyranoside | 529.1283, 409.0874, 391.0778           |
| 3   | 5.938               | C <sub>23</sub> H <sub>24</sub> O <sub>12</sub> | 491.1195         | 491.1166       | -5.91       | Trihydroxy-dimethoxyflavone-glucoside                                                               | 329.0599, 314.0368, 299.0134           |
| 4   | 6.008               | C <sub>21</sub> H <sub>20</sub> O <sub>9</sub>  | 415.1035         | 415.1014       | -4.96       | Chrysin-5-O-glucoside/Chrysin-7-O-glucoside                                                         | 253.0392                               |
| 5   | 6.013               | C <sub>23</sub> H <sub>22</sub> O <sub>13</sub> | 505.0988         | 505.0972       | -3.11       | Trihydroxy-dimethoxyflavone-glucuronid                                                              | 330.0289                               |
| 6   | 6.975               | C <sub>21</sub> H <sub>18</sub> O <sub>11</sub> | 445.0776         | 445.0763       | -3.01       | Baicalin                                                                                            | 269.0416, 251.0342, 223.0323           |
| 7   | 7.643               | C <sub>15</sub> H <sub>10</sub> O <sub>6</sub>  | 285.0405         | 285.04         | -1.63       | Scutellarein                                                                                        | 267.0262, 193.0039                     |
| 8   | 7.837               | C <sub>17</sub> H <sub>14</sub> O <sub>8</sub>  | 345.0616         | 345.0609       | -2.01       | Viscidulin III                                                                                      | 330.0320, 315.0077, 287.0095, 269.0028 |
| 9   | 8.111               | C <sub>21</sub> H <sub>18</sub> O <sub>10</sub> | 429.0827         | 429.0812       | -3.55       | Chrysin-7-O-glucuronide                                                                             | 253.0465                               |
| 10  | 8.156               | C <sub>22</sub> H <sub>20</sub> O <sub>12</sub> | 475.0882         | 475.0871       | -2.32       | Trihydroxy-methoxyflavone-glucuronide                                                               | 299.0473, 284.0291                     |
| 11  | 8.519               | C <sub>22</sub> H <sub>20</sub> O <sub>11</sub> | 459.0933         | 459.0925       | -1.72       | Wogonoside                                                                                          | 283.0567, 268.0330                     |
| 12  | 8.587               | C <sub>23</sub> H <sub>22</sub> O <sub>12</sub> | 489.1039         | 489.0948       | —           | Dihydroxy-dimethoxyflavone-glucuronide                                                              | 313.0671, 298.0435                     |
| 13  | 10.714              | C <sub>16</sub> H <sub>12</sub> O <sub>6</sub>  | 299.0561         | 299.0552       | -3.05       | Trihydroxy-methoxyflavone                                                                           | 284.0269, 256.0287                     |
| 14  | 11.135              | C <sub>15</sub> H <sub>10</sub> O <sub>5</sub>  | 269.0455         | 269.0451       | -1.67       | Baicalein                                                                                           | 251.0282, 223.0315                     |
| 15  | 12.121              | C <sub>17</sub> H <sub>14</sub> O <sub>7</sub>  | 329.0667         | 329.0652       | -4.49       | Trihydroxy-dimethoxyflavone                                                                         | 314.0365, 299.0133, 271.0208           |
| 16  | 12.781              | C <sub>18</sub> H <sub>16</sub> O <sub>7</sub>  | 343.0823         | 343.0811       | -3.58       | Dihydroxy-trimethoxyflavone                                                                         | 328.0753, 313.0283                     |
| 17  | 13.022              | C <sub>16</sub> H <sub>12</sub> O <sub>5</sub>  | 283.0612         | 283.0607       | -1.76       | Wogonin                                                                                             | 268.0327, 239.0337                     |
| 18  | 13.102              | C <sub>19</sub> H <sub>18</sub> O <sub>8</sub>  | 373.0929         | 373.0915       | -3.74       | Skullcap flavone II                                                                                 | 358.0609, 343.0388, 325.0291           |
| 19  | 13.291              | C <sub>17</sub> H <sub>14</sub> O <sub>6</sub>  | 313.0718         | 313.0708       | -3.08       | Dihydroxy-dimethoxyflavone                                                                          | 283.0182, 255.0176                     |
